# Supplementary material for: Molecular and histological correlates of cognitive decline across age in male C57BL/6J mice
Source: PubMed Central journal article supplement (PMC9480918; doi:10.1002/brb3.2736), 2022-08-15

# Sup Figure 3

## A

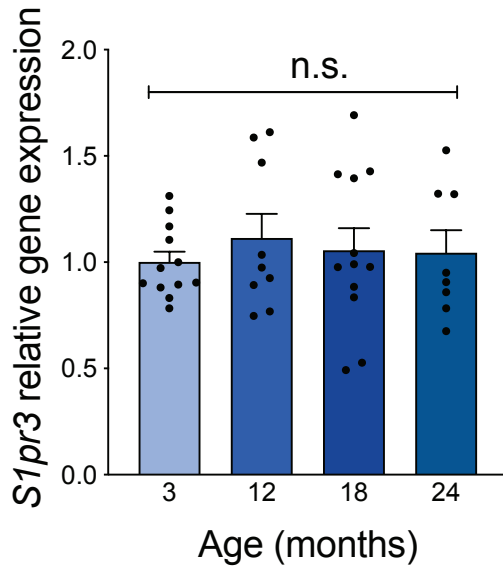

## B

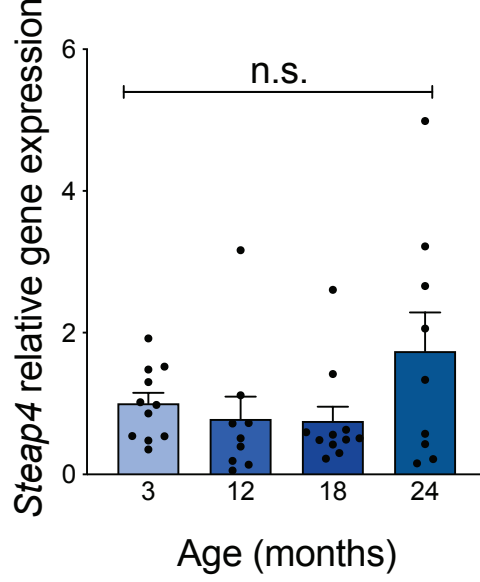

## C

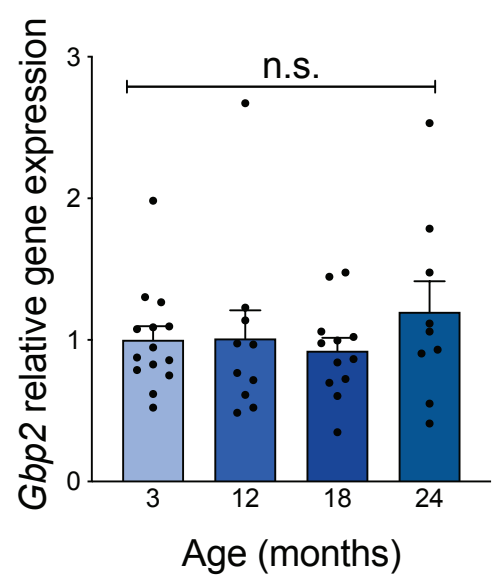

## D

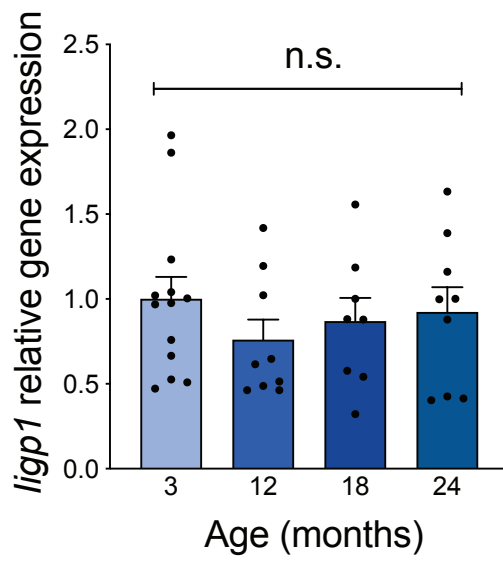

## E

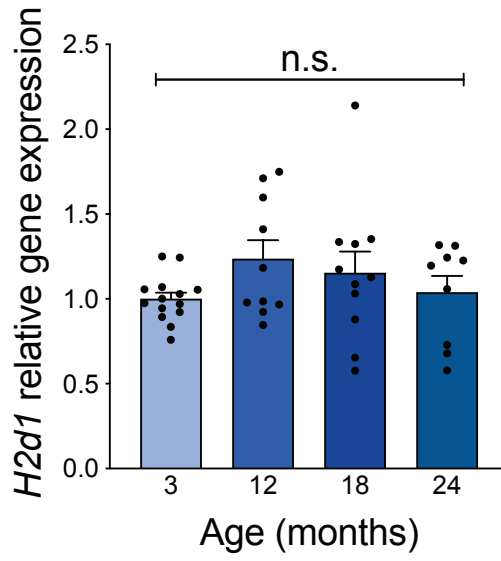

## F

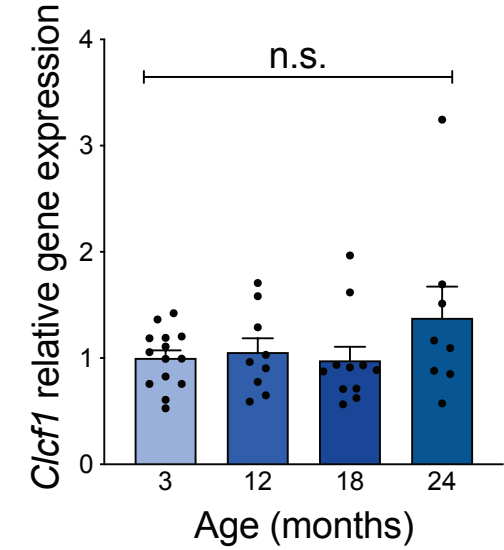

Supplement: BRB3-12-e2736-s003.pdf [file BRB3-12-e2736-s003.pdf]
